# Supplementary material for: Socioeconomic inequalities in the healthiness of food choices: Exploring the contributions of food expenditures
Source: PubMed Central journal article supplement (PMC4910945; doi:10.1016/j.ypmed.2016.04.012), 2016-07
Supplement: mmc1.pdf [file mmc1.pdf]

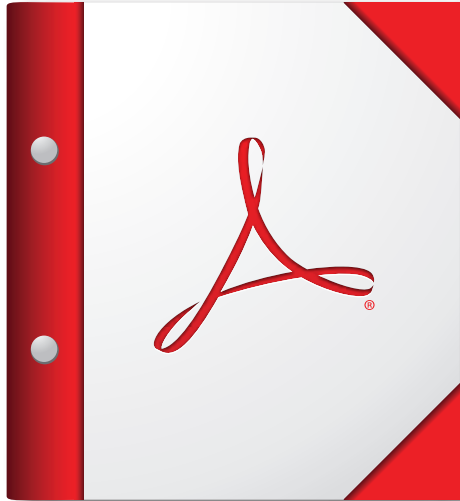

**For the best experience, open this PDF portfolio in  
Acrobat 9 or Adobe Reader 9, or later.**

[Get Adobe Reader Now!](#)
